# Supplementary material for: Functional Motor Symptoms in Parkinson’s Disease and Functional Parkinsonism: A Systematic Review
Source: Atypon-hosted journal article supplement (doi:10.1176/appi.neuropsych.19030058), 2019-08-30
Supplement: appi.neuropsych.19030058.ds001.pdf [file appi.neuropsych.19030058.ds001.pdf]

|                                  |                                          | Parkinson's disease                          | Functional Parkinsonism                                                                                                                                                                                       |                                                                                                                                                           |
|----------------------------------|------------------------------------------|----------------------------------------------|---------------------------------------------------------------------------------------------------------------------------------------------------------------------------------------------------------------|-----------------------------------------------------------------------------------------------------------------------------------------------------------|
| <b>Tremor</b>                    | <i>Type</i>                              | Rest                                         | Rest/postural/action                                                                                                                                                                                          |                                                                                                                                                           |
|                                  | <i>Finger tremor</i>                     | +                                            | Unusual                                                                                                                                                                                                       |                                                                                                                                                           |
|                                  | <i>Frequency</i>                         | Slow, 4-6 Hz                                 | Different frequency in different body parts                                                                                                                                                                   | <b>Variability</b><br><b>Entrainability</b> (change induced in the tremor, particularly to take up the same frequency and phase as the voluntary tapping) |
|                                  |                                          |                                              |                                                                                                                                                                                                               | Same frequency in different body parts                                                                                                                    |
|                                  | <i>Effect of distraction</i>             | Increase with mental calculation             | Decrease in amplitude or disappears: <b>distractibility</b>                                                                                                                                                   |                                                                                                                                                           |
|                                  | <i>Effect of holding weight</i>          | Tremor not transmitted                       | Tremor may be transmitted to other body segments                                                                                                                                                              |                                                                                                                                                           |
| <b>Rigidity</b>                  |                                          | Plastic rigidity                             | "Voluntary resistance"                                                                                                                                                                                        |                                                                                                                                                           |
|                                  | <i>Cogwheeling</i>                       | +                                            | Coactivation sign (oppositional rigidity « Gegenhalten » with no real cogwheeling)                                                                                                                            |                                                                                                                                                           |
|                                  | <i>Effect of reinforcement maneuvers</i> | Rigidity increases                           | Rigidity diminished                                                                                                                                                                                           |                                                                                                                                                           |
| <b>Bradykinesia</b>              | <i>Sequence effect</i>                   | +                                            | No                                                                                                                                                                                                            |                                                                                                                                                           |
|                                  | <i>Distractibility</i>                   | No                                           | Marked slowness of voluntary movements with <b>distractibility</b>                                                                                                                                            |                                                                                                                                                           |
|                                  | <i>Hypokinesia</i>                       | +                                            | No                                                                                                                                                                                                            |                                                                                                                                                           |
|                                  | <i>Fatiguing</i>                         | +                                            | No                                                                                                                                                                                                            |                                                                                                                                                           |
|                                  |                                          |                                              | Difficulty for performing everyday tasks/manuals tasks with grimacing, sighs. Exaggerated discrepancy between the major apparent difficulty in movement initiation and the actual speed of movement execution |                                                                                                                                                           |
| <b>Balance</b>                   | <i>Pull test</i>                         | Variable retropulsion<br>Patient may fall    | Bizarre response to the pull test, extreme response for very light pulls but never falls.<br><br>Better balance observed compared to patient's complaining.                                                   |                                                                                                                                                           |
| <b>Gait</b>                      | <i>Type</i>                              | Slow, stiff, with retropulsion or propulsion | Slow, stiff, may be painful                                                                                                                                                                                   |                                                                                                                                                           |
|                                  | <i>Arm swing</i>                         | Flexed posture with reduce arm swing         | Diminished or absent on the most affected side; arm held stiffly extended and adducted to the side                                                                                                            |                                                                                                                                                           |
|                                  |                                          | Decrease while running                       | Persist while running                                                                                                                                                                                         |                                                                                                                                                           |
|                                  | <i>Freezing</i>                          | Common                                       | No                                                                                                                                                                                                            |                                                                                                                                                           |
|                                  | <i>Other</i>                             |                                              | Buckling of the knees; atasia-abasia                                                                                                                                                                          |                                                                                                                                                           |
| <b>Speech</b>                    |                                          |                                              | Baby talk; gibberish; stuttering.                                                                                                                                                                             |                                                                                                                                                           |
| <b>Writing</b>                   |                                          | Micrographia                                 | Slow but no micrographia                                                                                                                                                                                      |                                                                                                                                                           |
| <b>Other neurologic features</b> |                                          |                                              | Give-way weakness, non-anatomic sensory loss, unusual diffuse muscle pain and tenderness, complaints of memory disturbances, visual dysfunction                                                               |                                                                                                                                                           |

**Table S1 : Clinical differences between functional parkinsonism and Parkinson's disease**

**Table S2: : Diagnosis criteria for FND and PD in the included studies**

| Author, date        | Clinical criteria for functional symptoms                                                                                                                                                                                                                                                                                                | Clinical criteria for Parkinson's disease |
|---------------------|------------------------------------------------------------------------------------------------------------------------------------------------------------------------------------------------------------------------------------------------------------------------------------------------------------------------------------------|-------------------------------------------|
| Walter AS, 1988     | Case reports – no diagnostic criteria                                                                                                                                                                                                                                                                                                    |                                           |
| Lang AE, 1995       | Fahn and Williams criteria                                                                                                                                                                                                                                                                                                               | -                                         |
| Factor SA, 1995     | Fahn and Williams criteria                                                                                                                                                                                                                                                                                                               | -                                         |
| Booij, 2001         | NA                                                                                                                                                                                                                                                                                                                                       | UK Brain Bank criteria                    |
| Gaig C, 2006        | Fahn and Williams criteria                                                                                                                                                                                                                                                                                                               | NA                                        |
| Benaderette S, 2006 | Fahn and Williams criteria                                                                                                                                                                                                                                                                                                               | UK Brain Bank criteria                    |
| Felicio, 2010       | Fahn and Williams criteria                                                                                                                                                                                                                                                                                                               | UK Brain Bank criteria                    |
| Onofrj, 2011        | DSM IV TR                                                                                                                                                                                                                                                                                                                                | UK Brain Bank criteria                    |
| Jankovic J, 2012    | Home-made criteria                                                                                                                                                                                                                                                                                                                       |                                           |
| Baik JS, 2012       | Case reports – no diagnostic criteria                                                                                                                                                                                                                                                                                                    |                                           |
| Pourfar MH, 2012    | Case reports – no diagnostic criteria                                                                                                                                                                                                                                                                                                    |                                           |
| Umeh CC, 2013       | Case reports – no diagnostic criteria                                                                                                                                                                                                                                                                                                    |                                           |
| Sage JI, 2015       | NA                                                                                                                                                                                                                                                                                                                                       | NA                                        |
| Pareés I, 2013      | Fahn and Williams criteria                                                                                                                                                                                                                                                                                                               | UK Brain Bank criteria                    |
| Colosimo C, 2015    | Fahn and Williams criteria                                                                                                                                                                                                                                                                                                               | NA but UKBBC fulfilled                    |
| Bonnet C, 2016      | Case reports – no diagnostic criteria                                                                                                                                                                                                                                                                                                    |                                           |
| Erro R, 2016        | Case reports – no diagnostic criteria                                                                                                                                                                                                                                                                                                    |                                           |
| Langevin JP, 2016   | Case reports – no diagnostic criteria                                                                                                                                                                                                                                                                                                    |                                           |
| Taylor S, 2016      | criteria for both SWEDDs and PD patients required at least two of the following: rest- ing tremor, bradykinesia, and rigidity or asymmetric resting tremor or asymmetric bradykinesia. At baseline, SWEDDs and PD patients were required to have had a diagnosis of PD for less than 2 years and be at a Hoehn and Yahr stage of 1 or 2. |                                           |
| Polara G, 2018      | Fahn and Williams criteria                                                                                                                                                                                                                                                                                                               | UK Brain Bank criteria                    |
| Wissel B, 2018      | Gupta and Lang criteria for FMD<br>DSM-5 for other FND                                                                                                                                                                                                                                                                                   | UK Brain Bank criteria                    |
| Kumar R, 2018       | Case reports – no diagnostic criteria                                                                                                                                                                                                                                                                                                    |                                           |

NA : Not Available; UKBBC : UK Brain Bank Criteria; FND : Functional Neurological Disorder; PD : Parkinson Disease

**Table S3. Comparison of patients with functional parkinsonism and patients with PD-FND reported in the articles of the review.**

|                                     | Functional parkinsonism | Functional neurological disorder in Parkinson's disease. |
|-------------------------------------|-------------------------|----------------------------------------------------------|
| <b>n =</b>                          | 120                     | 121                                                      |
| <b>Age at evaluation (years)</b>    | 50.7                    | 61.3                                                     |
| <b>Women %</b>                      | 62.1%                   | 57 %                                                     |
| <b>Psychiatric history</b>          | 67.2 %                  | 60 %                                                     |
| <b>Stress factor identified</b>     | 46.8%                   | 82.5 %                                                   |
| <b>Duration of symptoms (years)</b> | 5.03                    | 7.8                                                      |
| <b>Nuclear imaging</b>              | All normal              | All abnormal                                             |
| <b>Functional tremor</b>            | 72.2 %                  | 33.8%                                                    |

**Figure S1: Flow diagram of functional parkinsonism and functional motor symptoms in Parkinson's disease studies' selection process.**

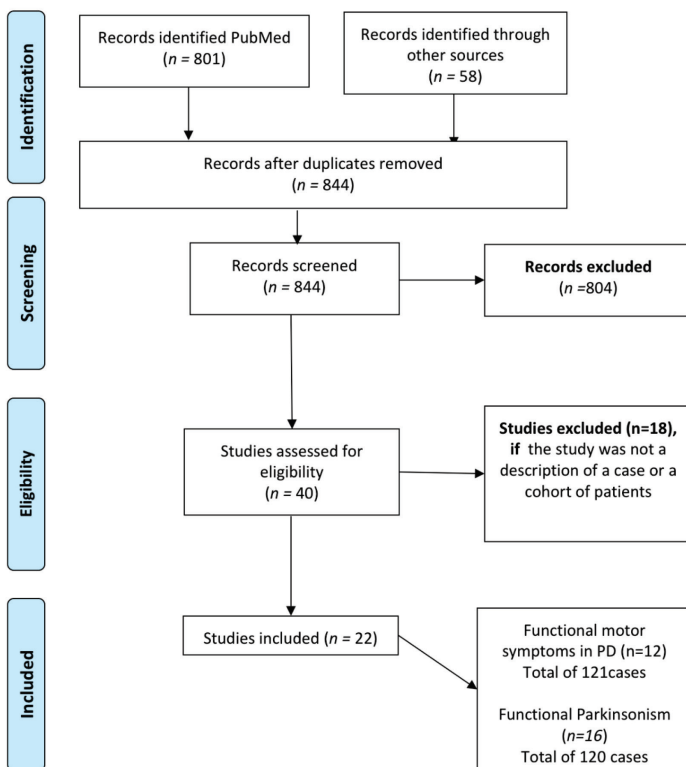

The literature search was performed from the PubMed electronic database, using the following Mesh heading : ("psychogenic" OR "functional disorder" OR "conversion" OR "hysteria" OR "somatoform") AND ("Parkinson" OR "parkinsonism" OR "tremor").  
PD : Parkinson's Disease
